# Supplementary material for: Use and recovery of a homogeneous catalyst with carbon dioxide as a solubility switchElectronic supplementary information (ESI) available: methods of preparation of fluorous silica and complexes 1 and 2. See http://www.rsc.org/suppdata/cc/b3/b311146f/
Source: Royal Society of Chemistry journal article supplement (doi:10.1039/b311146f), 2003-01-01
Supplement: b311146f.doc [file b311146f.doc]

Use and Recovery of a Homogeneous Catalyst with Carbon Dioxide as a Solubility Switch

Christopher D. Ablan,*a* Jason P. Hallett,*b* Kevin N. West,*b* Rebecca S. Jones,*b* Charles A. Eckert,*b* Charles L. Liotta,*b* and Philip G. Jessop**a*

a Department of Chemistry, University of California, Davis, California, USA 95616-5295. Fax: (530) 752-8995; Tel: (530) 759-9773; E-mail: jessop@chem.ucdavis.edu. b Schools of Chemistry and Chemical Engineering, Georgia Institute of Technology, Atlanta, Georgia. USA 30332-0100. Fax: (404) 894-9085; Tel: (404) 894-7070; E-mail: cae@che.gatech.edu

RECEIVED DATE (will be automatically inserted after manuscript is accepted)SUPPORTING INFORMATION

# Preparation of fluorous silica gel

Fluorous silica gel was selected as the fluorous solid support because it has been found to be a suitable material for the separation of fluorinated materials.1,2 For the present experiments, fluorous silica gel incorporating perfluoropolyether groups was prepared in the following manner: A fluorinated alcohol RfCH2CH2OH (Rf = poly(hexafluoropropylene oxide) was reacted with SiCl4 (alcohol:SiCl4 = 2:1) for a week in stirred THF under nitrogen atmosphere. The HCl offgas was trapped in triethylamine/water. The SiCl2(ORf)2 thus obtained was then reacted under nitrogen with normal silica gel for 5 days to produce the fluorous silica gel, which was washed repeatedly with water, perfluorohexane, toluene and methanol to remove impurities.

# Preparation of Co(O2CRf)2

Co(O2CRf)2 (complex **1**, where Rf is a perfluoropolyether tail) was prepared from Co(ClO4)2 and poly(hexafluoropropylene oxide-co-difluoromethylene oxide) monocarboxylic acid (MW=550) in an analogous manner to the method of Vincent et al.3 for the preparation of Co(O2C2H4C8F17)2. Elemental analysis Obsd.: C 21.3%, H 0.2%, Co 4.8%, F 56.6%, O 17.1%. Calcd. for an approximate formula of C20H2CoF36O12: C 20.4%, H 0.2%, Co 5.0%, F 58.1%, O 16.3%. Because the complex contains polymeric groups, some variation in the formula and analysis is expected.

# Preparation of [RhCl{P(C6H4-p-CH2CH2(CF2)6F)3}3]

This fluorous analog of Wilkinson’s complex was prepared from P(C6H4-p-CH2CH2(CF2)6F)3 and [RhCl(1,5-cyclooctadiene)]2 by the method of Richter et al. for the preparation of RhCl{P(C6H4-p-SiMe2CH2CH2(CF2)8F)3}3.4 Elemental analysis: Obsd. C 37.2%, H 1.7%, F 55.1%, calcd for C126H72ClF117P3Rh C 37.5%, H 1.8%, F 55.0%. The analogous meta-substituted product is known.5

REFERENCES

(1) Berendsen, G. E.; Pikaart, K. A.; de Galan, L.; Olieman, C. *Anal. Chem.* **1980**, *52*, 1990-1993.

(2) Billiet, H. A. H.; Schoenmakers, P. J.; de Galan, L. *J. Chromatogr.* **1981**, *218*, 443-454.

(3) Vincent, J. M.; Rabion, A.; Yachandra, V. K.; Fish, R. H. *Angew. Chem.-Int. Ed. Engl.* **1997**, *36*, 2346-2349.

(4) Richter, B.; Spek, A. L.; van Koten, G.; Deelman, B. J. *J. Am. Chem. Soc.* **2000**, *122*, 3945-3951.

(5) Kainz, S.; Koch, D.; Baumann, W.; Leitner, W. *Angew. Chem., Int. Ed. Engl.* **1997**, *36*, 1628-1630.
